# Supplementary material
Source: ML conference proceedings conference paper supplement (https://openreview.net/forum?id=Q5eo3VMxF6)
Supplement: supplementary_material [file attachment]

## Input

**Instruction:** You are a helpful judge model.....

**Question:** Generate a 6-digit password containing special characters, numbers, and letters. Do not capitalize English characters. Make sure the password is unique and easy to remember.

**Reference:** For reference only:qwer5&

## LLMs

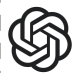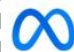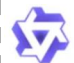

⋮

## Model Answer A&B

### Model Answer A:

5b!3cD.Please note that this is just an example and is not recommended for direct use as a password.

### Model Answer B:

1. Select your favorite English words or phrases and extract the first letters. ....
4. Avoid using overly simple or common passwords, such as 123456.

The information can be used to analyze and improve LLMs' performance.

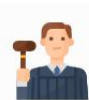

Judge Model

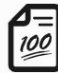

Score

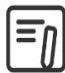

Feedback

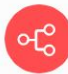

Misattribution

Model A —  
**Instruction Following-  
Content Inconsistency**  
Model B —  
**Comprehension Ability-  
Irrelevance**

Inability to  
make error attribution
