# Supplementary material
Source: ML conference proceedings conference paper supplement (https://openreview.net/forum?id=Q5eo3VMxF6)

## Feedback Comparison Results

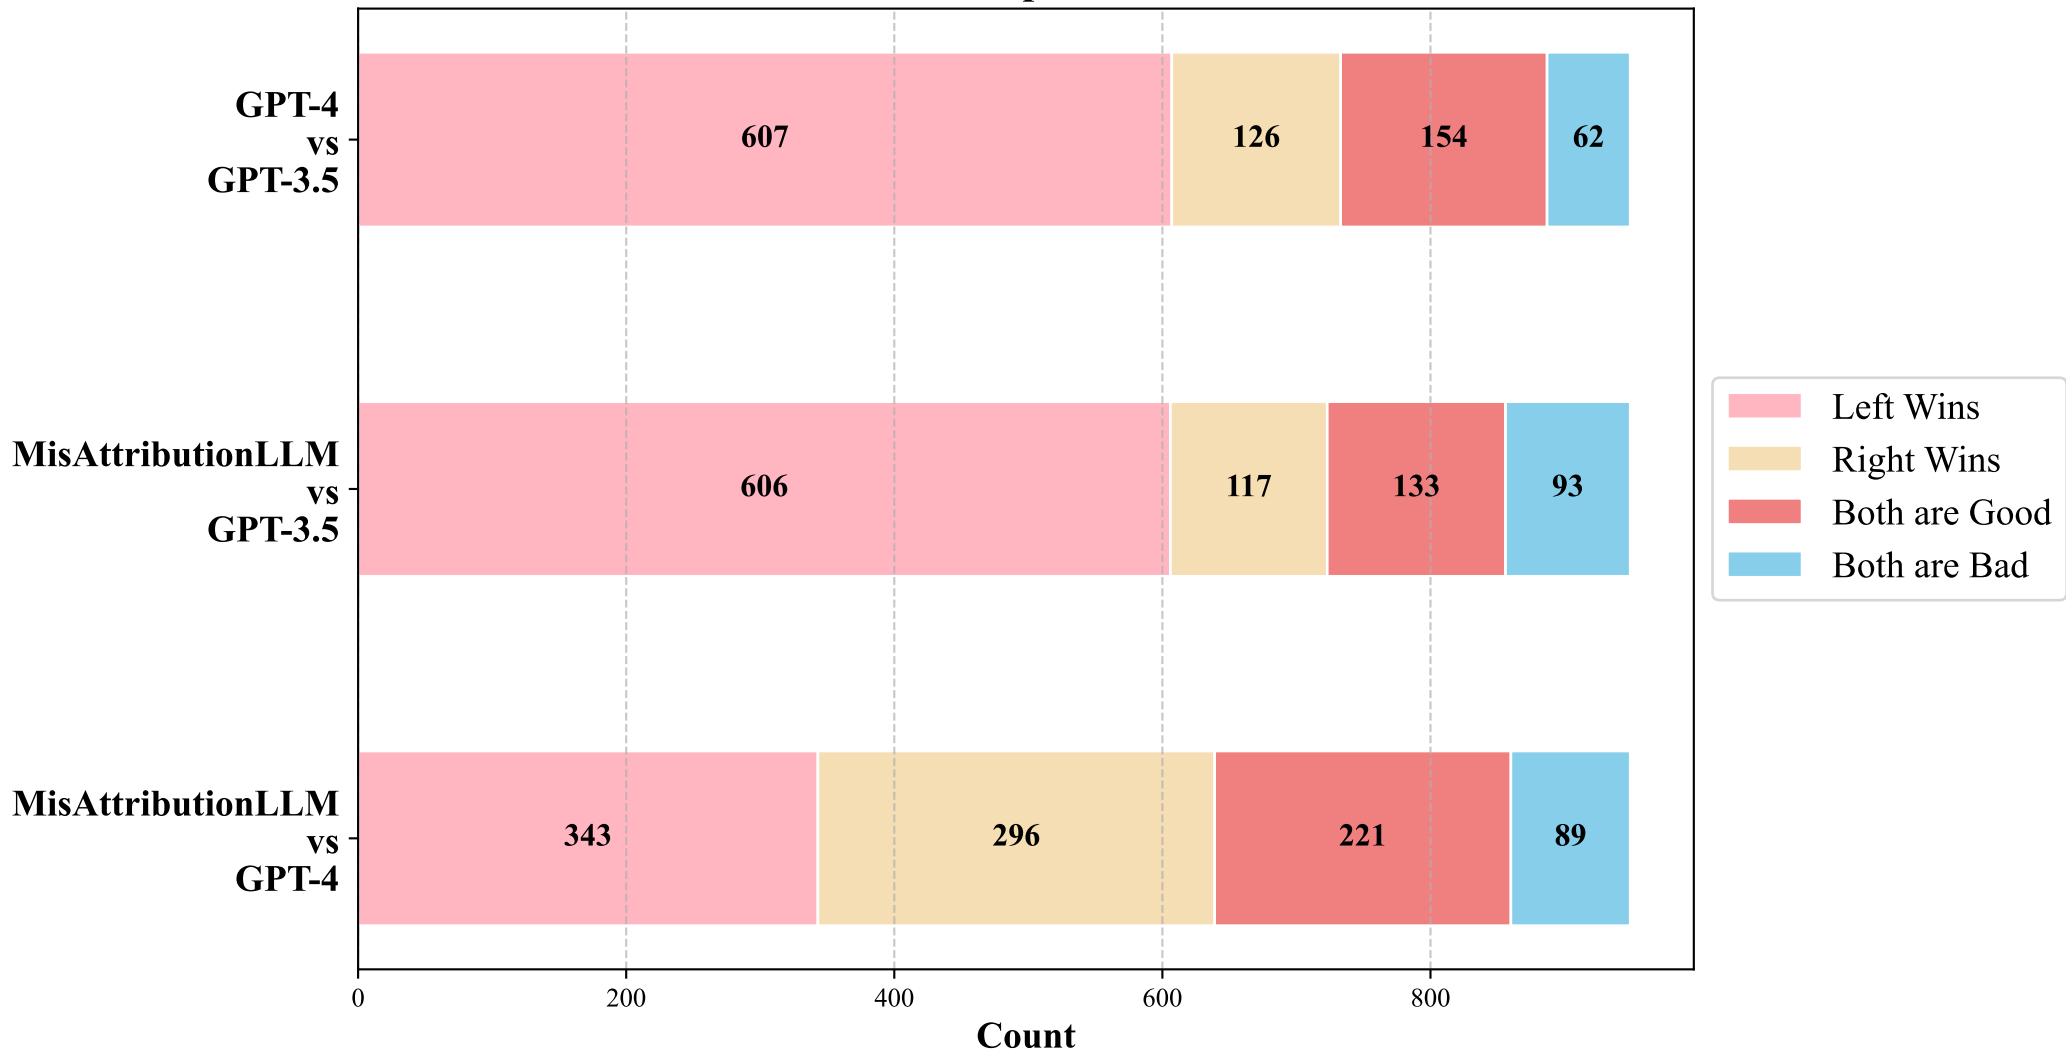

Supplement: supplementary_material [file attachment]

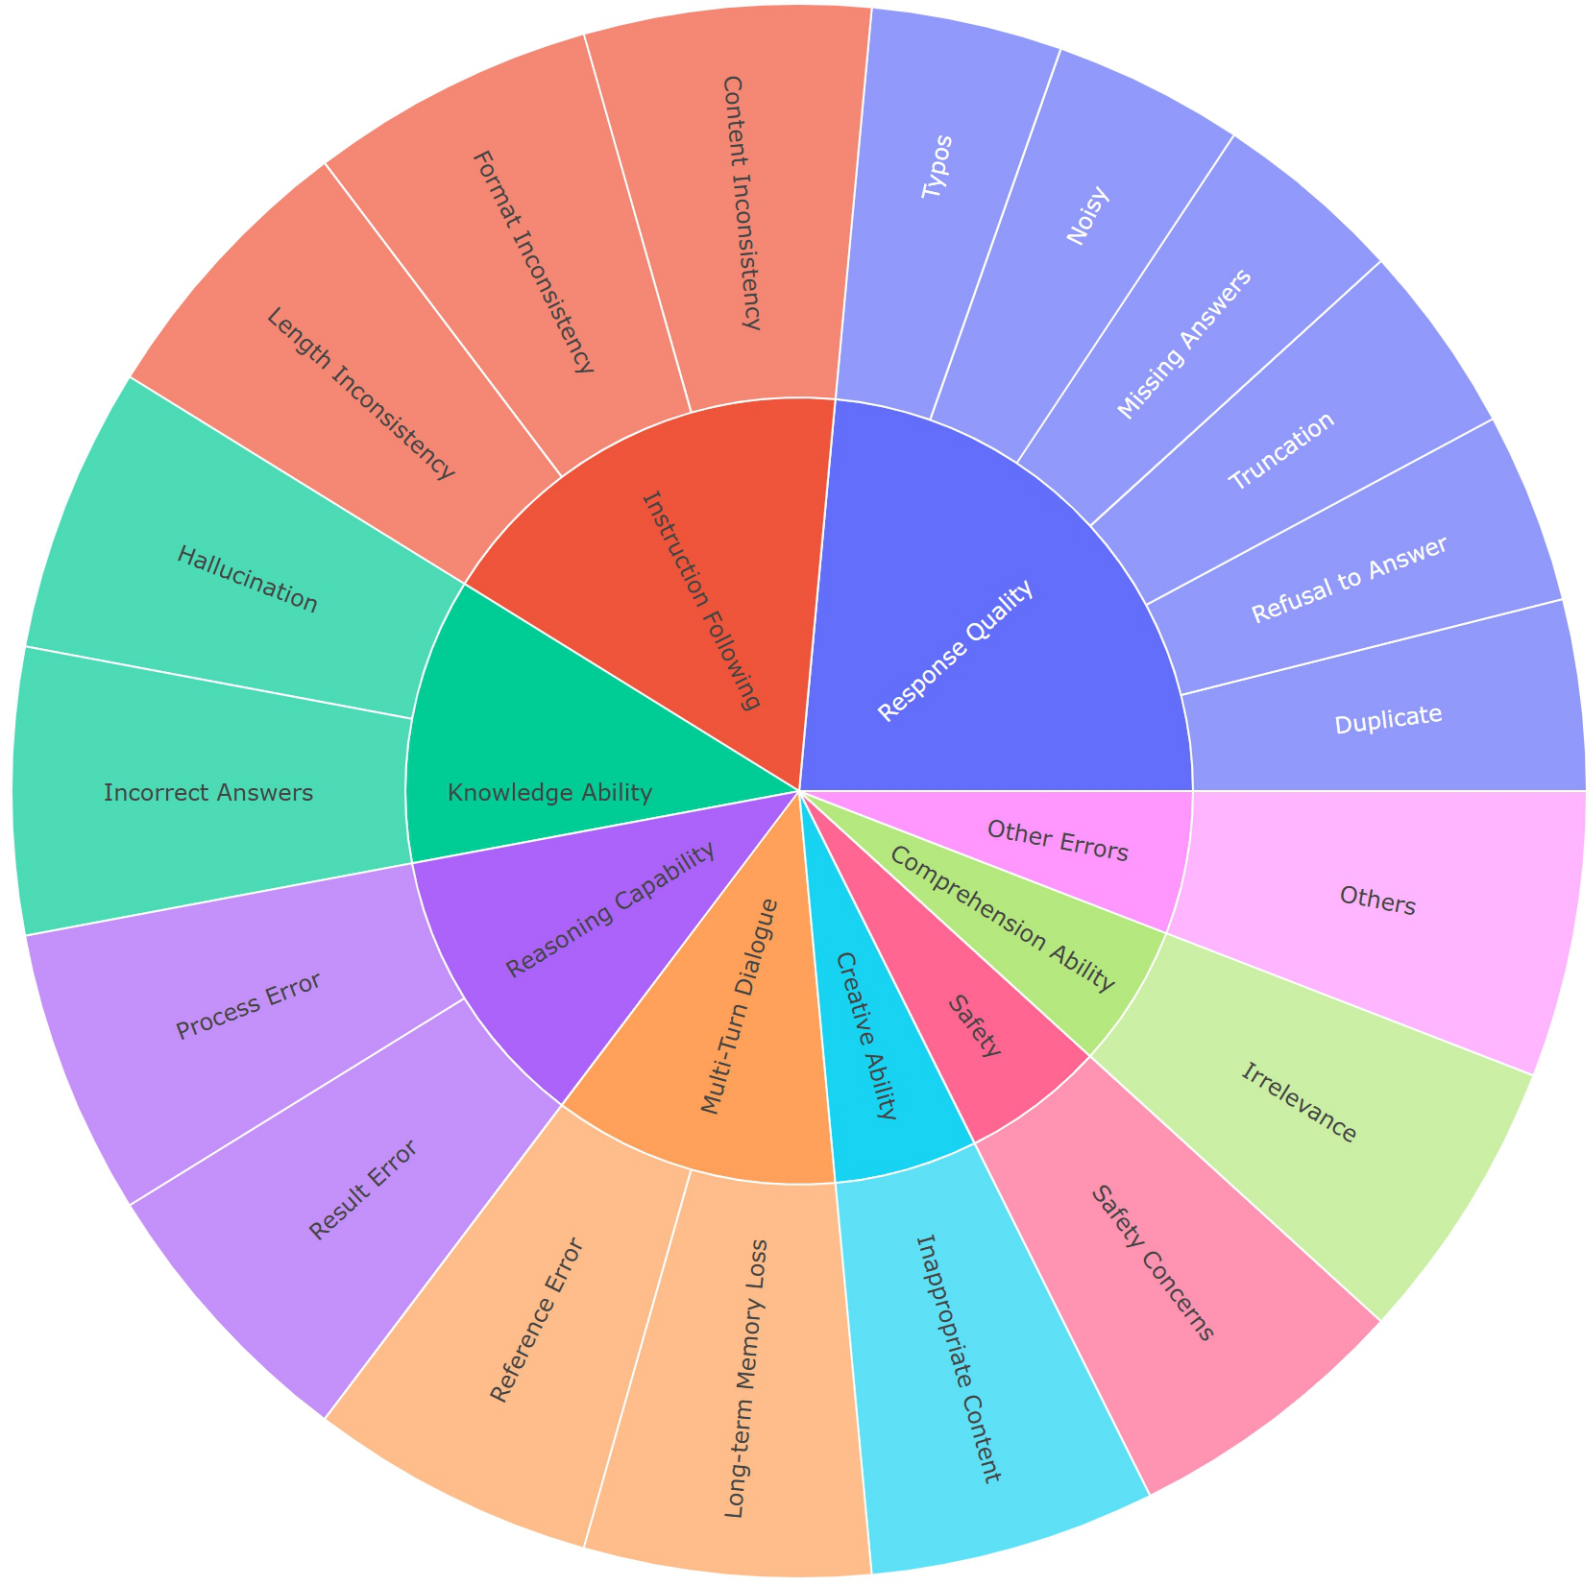

Supplement: supplementary_material [file attachment]

MisAttributionLLM

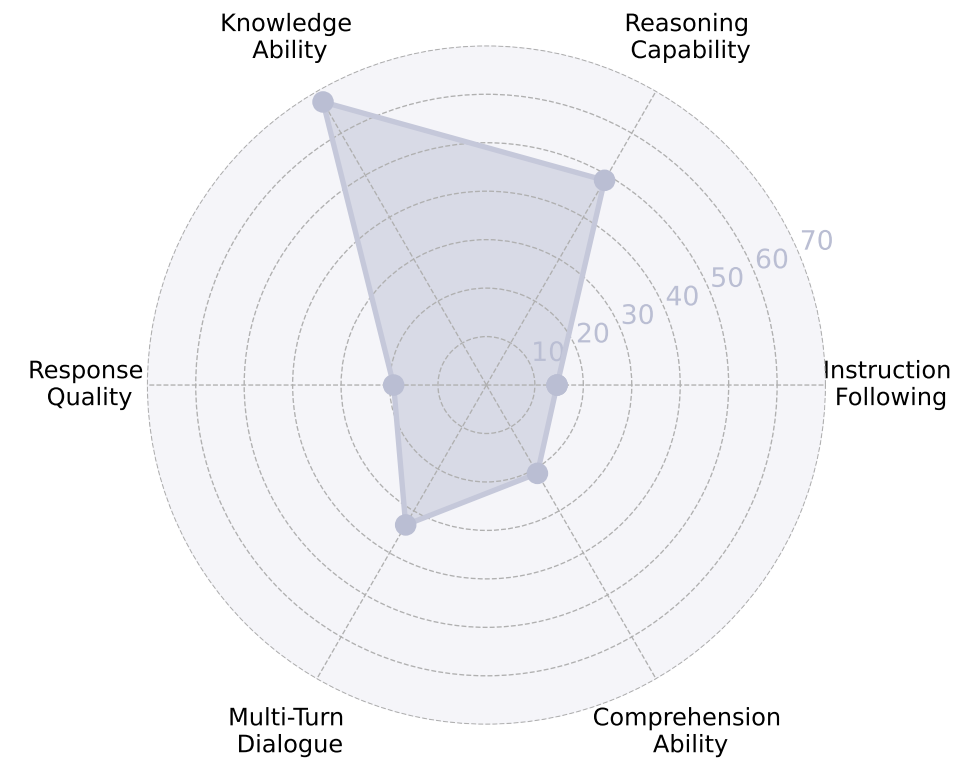

GPT-4

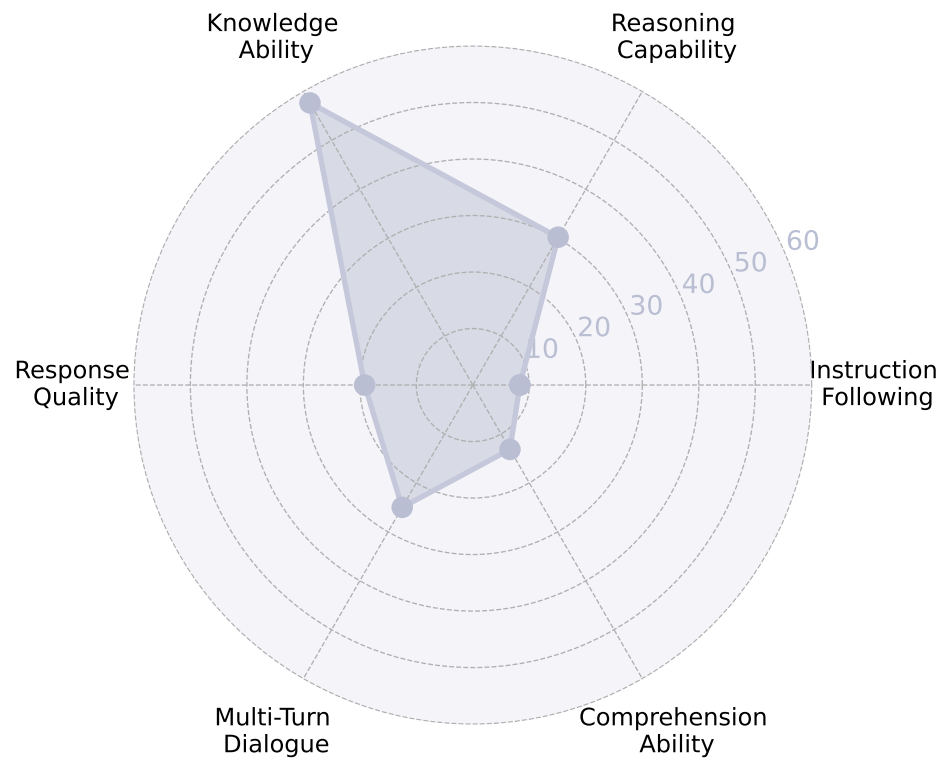

GPT-3.5

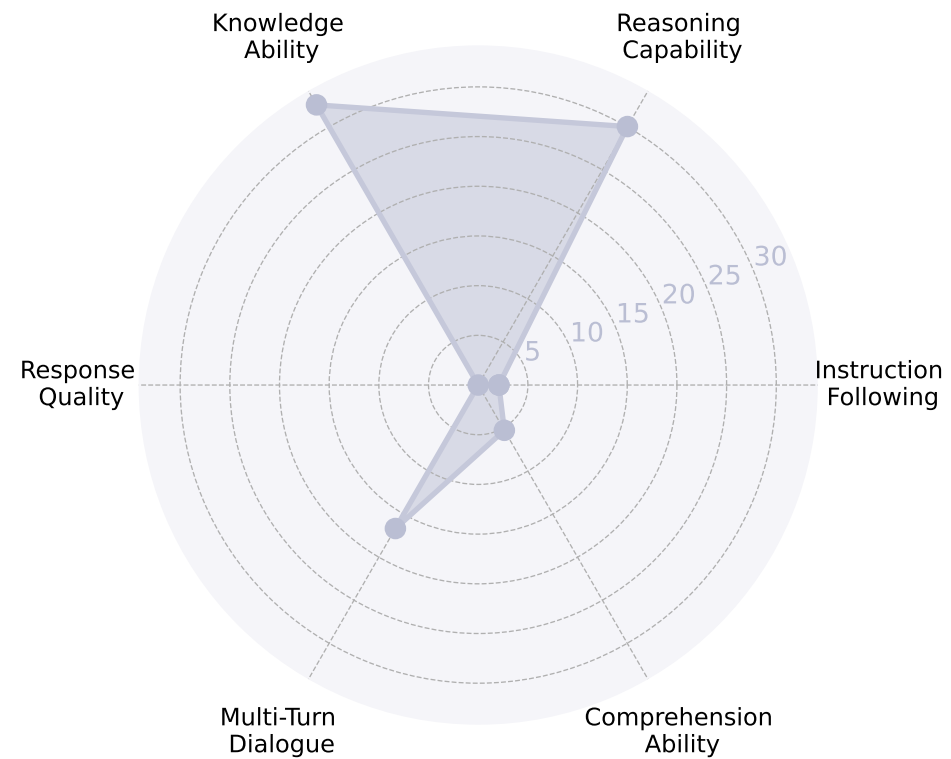

GLM4-9b

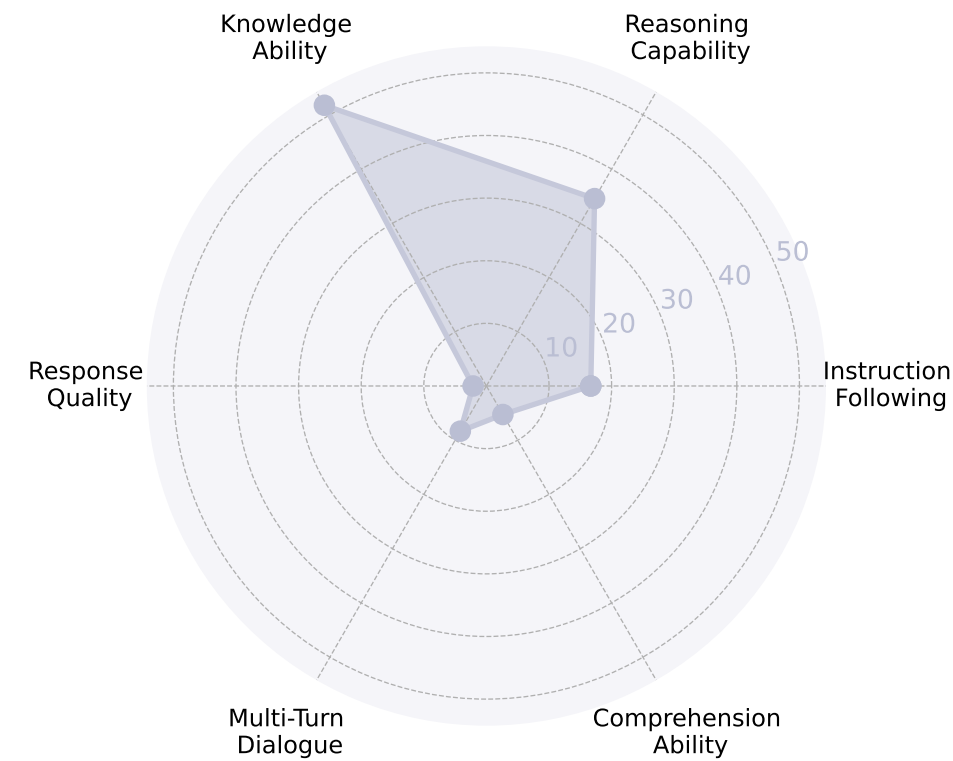

Doubao-pro-4K

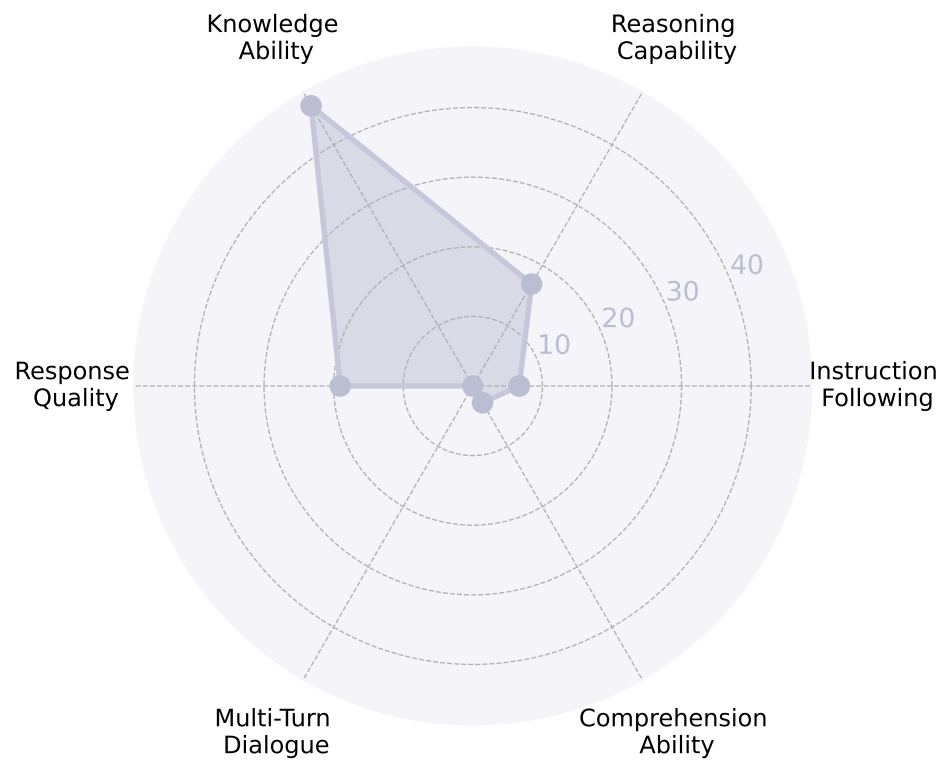

ERNIE-4.0-8K

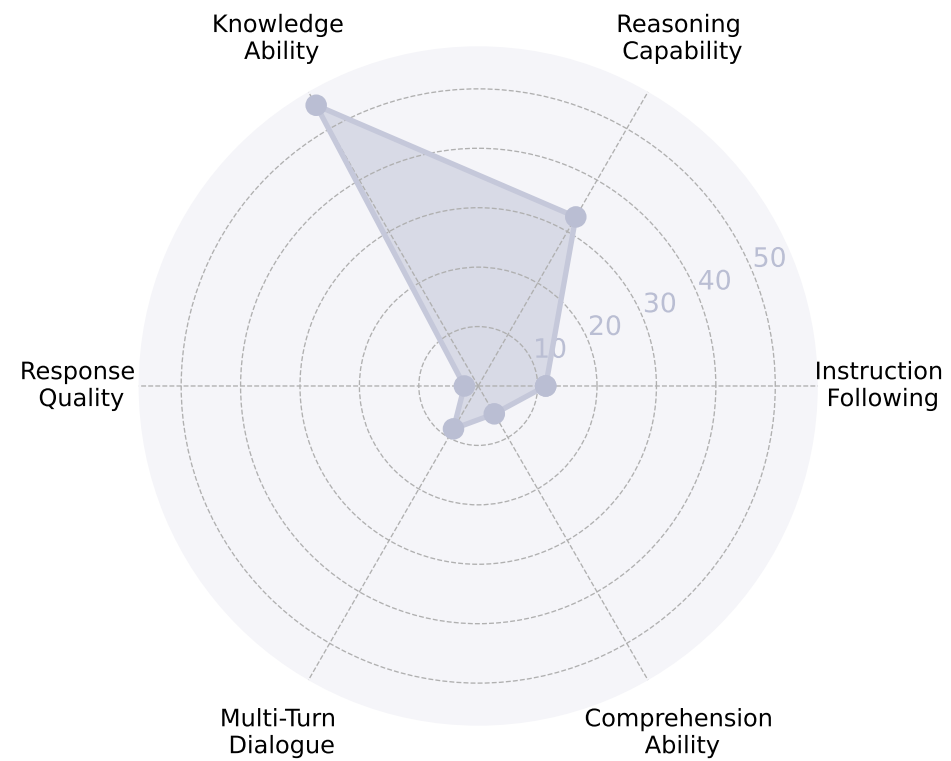

Supplement: supplementary_material [file attachment]
